# Supplementary material for: Increased Expression of CSF-1 Associates With Poor Prognosis of Patients With Gastric Cancer Undergoing Gastrectomy
Source: PubMed Central journal article supplement — Medicine (Baltimore). 2016 Mar 7;95(9):e2675. doi: 10.1097/MD.0000000000002675 (PMC4782839; doi:10.1097/md.0000000000002675), 2016-03-07

**Figure S1. Kaplan-Meier analysis for overall survival of patients with gastric cancer according to CSF-1 expression.** Kaplan-Meier analysis for overall survival according to CSF-1 expression in patients with pT1 stage tumor (a); pT2 stage tumor (b); pN0 stage tumor (c); pN1 stage tumor (d); pN2 stage tumor (e); TNM I stage tumor (f); TNM II stage tumor (g); Lauren's diffuse type tumor (h). p value, calculated by Log rank test,  $< 0.05$  was regarded as statistically significant.

Fig S1

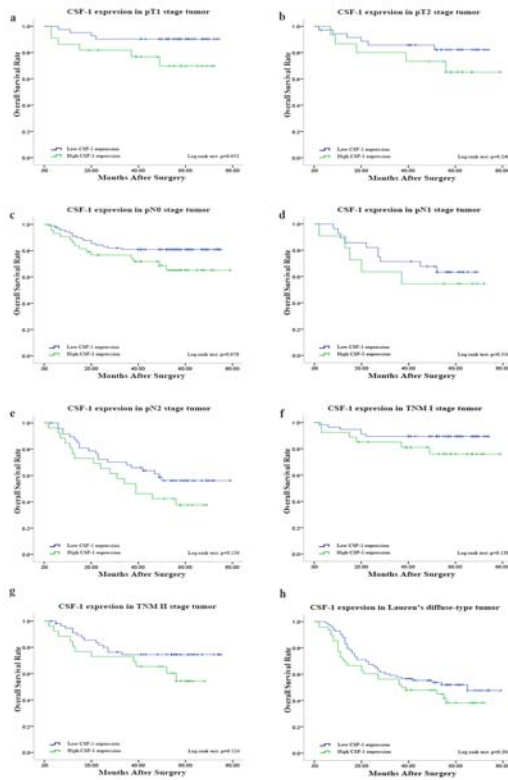

Supplement: medi-95-e2675-s001.pdf [file medi-95-e2675-s001.pdf]
